# Supplementary material for: Born to Score? The Relationship between Left-Handedness and Success from the 7-Meter Line
Source: MDPI journal article supplement (doi:10.3390/sym14102163), 2022-10-15
Supplement: s1 [file s1]

**Supplemental table:** Handedness in 7-meter shootouts

| Tournament         | Year | Game          | Left-handed shooters | Right-handed shooters | % of shooters that are left handed |
|--------------------|------|---------------|----------------------|-----------------------|------------------------------------|
| Champions League   | 2014 | Semi-final    | 3                    | 6                     | 33%                                |
| Champions League   | 2016 | Final         | 3                    | 7                     | 30%                                |
| World Championship | 2021 | Quarter-final | 5                    | 5                     | 50%                                |
| Champions League   | 2022 | Final         | 5                    | 4                     | 56%                                |
| Total              |      |               | 16                   | 22                    | 42%                                |
